# Supplementary material for: Triglyceride-rich lipoprotein remnants, low-density lipoproteins, and risk of coronary heart disease: a UK Biobank study
Source: PubMed Central journal article supplement — Eur Heart J. 2023 Jun 26;44(39):4186–95. doi: 10.1093/eurheartj/ehad337 (PMC10576615; doi:10.1093/eurheartj/ehad337), 2023-06-26
Supplement: ehad337_supplementary_data.pdf [file ehad337_supplementary_data.pdf]

## **SUPPLEMENTAL FILE**

### **Triglyceride-rich lipoprotein remnants, low-density lipoproteins, and risk of coronary heart disease: a UK Biobank study**

Elias Björnson<sup>1</sup>, Martin Adiels<sup>1,2</sup>, Marja-Riitta Taskinen<sup>3</sup>, Stephen Burgess<sup>4,5</sup>, Aidin Rawshani<sup>1</sup>, Jan Borén<sup>1</sup> and Chris J Packard<sup>6</sup>

<sup>1</sup>Department of Molecular and Clinical Medicine, University of Gothenburg, Gothenburg, Sweden; <sup>2</sup>School of Public Health and Community Medicine, Institute of Medicine, University of Gothenburg, Gothenburg, Sweden. <sup>3</sup>Research Program for Clinical and Molecular Metabolism, University of Helsinki; University of Helsinki, Finland; <sup>4</sup>MRC Biostatistics Unit, University of Cambridge, Cambridge, UK, <sup>5</sup>Cardiovascular Epidemiology Unit, Department of Public Health and Primary Care, University of Cambridge, Cambridge, UK, <sup>6</sup>Institute of Cardiovascular and Medical Sciences, University of Glasgow, Glasgow, UK.

**Supplementary Table 1.** 20 SNPs in clusters 1 and 2 with largest effect sizes (effects are minor/major allele). \*P-values reported as zero if lower than the level of machine precision (2.225E-308)

**A. SNPs in cluster 1 with largest effect sizes (n=20).**

| Gene           | rs-number   | Beta coefficient ApoB | Beta coefficient LDL-C | Beta coefficient TRL/rem-C | P-value* ApoB | P-value* LDL-C | P-value* TRL/rem-C | TRL/rem-C to apoB beta ratio | TRL/rem-C to LDL-C beta ratio |
|----------------|-------------|-----------------------|------------------------|----------------------------|---------------|----------------|--------------------|------------------------------|-------------------------------|
| PCSK9          | rs11591147  | -0,0972               | -0,371                 | -0,0665                    | 0             | 0              | 2,45E-143          | 0,68                         | 0,18                          |
| TOMM40         | rs11668327  | -0,0508               | -0,153                 | -0,0273                    | 0             | 0              | 1,49E-182          | 0,54                         | 0,18                          |
| CEACAM16_BCL3  | rs11881756  | -0,0409               | -0,121                 | -0,0165                    | 0             | 0              | 2,21E-53           | 0,4                          | 0,14                          |
| APOC2_APOC4    | rs12721109  | -0,117                | -0,347                 | -0,0456                    | 0             | 0              | 6,82E-98           | 0,39                         | 0,13                          |
| PVRL2          | rs142042446 | 0,0273                | 0,0797                 | 0,0142                     | 0             | 0              | 2,34E-80           | 0,52                         | 0,18                          |
| BCAM           | rs28399637  | -0,0228               | -0,0698                | -0,0128                    | 0             | 1,45E-268      | 1,78E-65           | 0,56                         | 0,18                          |
| PVRL2          | rs387976    | 0,0384                | 0,12                   | 0,0369                     | 0             | 6,26E-252      | 3,25E-169          | 0,96                         | 0,31                          |
| APOC1P1_APOC1  | rs60049679  | -0,0734               | -0,276                 | -0,0458                    | 1,57E-221     | 2,35E-249      | 4,38E-50           | 0,62                         | 0,17                          |
| LDLR           | rs72658867  | 0,0516                | 0,146                  | 0,032                      | 0             | 9,08E-217      | 6,15E-75           | 0,62                         | 0,22                          |
| TOMM40         | rs115881343 | -0,0266               | -0,0833                | -0,0142                    | 1,96E-268     | 2,27E-210      | 1,7E-44            | 0,53                         | 0,17                          |
| PVRL2          | rs41289512  | 0,0141                | 0,054                  | 0,0093                     | 1,12E-162     | 6,01E-190      | 5,39E-41           | 0,66                         | 0,17                          |
| APOB_LOC645949 | rs10166144  | -0,0163               | -0,0607                | -0,0111                    | 1,98E-165     | 1,13E-183      | 7,4E-45            | 0,68                         | 0,18                          |
| LDLR           | rs6511721   | -0,0175               | -0,0505                | -0,0077                    | 1,76E-236     | 4,38E-158      | 2,76E-27           | 0,44                         | 0,15                          |
| SMARCA4        | rs12052058  | -0,042                | -0,11                  | -0,032                     | 1,38E-260     | 2,31E-144      | 1,2E-85            | 0,76                         | 0,29                          |
| CEACAM16_BCL3  | rs2965109   | -0,031                | -0,124                 | -0,0198                    | 1,85E-111     | 2,18E-141      | 7,65E-27           | 0,64                         | 0,16                          |
| APOC1          | rs12691088  | -0,0264               | -0,08                  | -0,0125                    | 4,71E-177     | 9,88E-130      | 1,22E-23           | 0,47                         | 0,16                          |
| KANK2          | rs7188      | 0,015                 | 0,0604                 | 0,0112                     | 4,91E-100     | 1,85E-129      | 1,95E-32           | 0,75                         | 0,19                          |
| APOB_C2orf43   | rs6547409   | -0,0118               | -0,046                 | -0,00715                   | 7,33E-107     | 4,43E-129      | 2,4E-23            | 0,61                         | 0,16                          |
| LDLR           | rs73015030  | -0,0353               | -0,107                 | -0,02                      | 7,73E-163     | 3,24E-119      | 7,62E-31           | 0,57                         | 0,19                          |
| MYBPHL         | rs55660224  | -0,0139               | -0,052                 | -0,00902                   | 3,86E-98      | 4,57E-109      | 2,18E-24           | 0,65                         | 0,17                          |

**B. SNPs in cluster 2 with largest effect sizes (n=20).**

| Gene               | rs-number   | Beta coefficient ApoB | Beta coefficient LDL-C | Beta coefficient TRL/rem-C | P-value* ApoB | P-value* LDL-C | P-value* TRL/rem-C | TRL/rem-C to apoB beta ratio | TRL/rem-C to LDL-C beta ratio |
|--------------------|-------------|-----------------------|------------------------|----------------------------|---------------|----------------|--------------------|------------------------------|-------------------------------|
| BUD13_LINC00900    | rs12280753  | 0,0214                | 0,0651                 | 0,0531                     | 8,13E-105     | 3,31E-78       | 0                  | 2,48                         | 0,82                          |
| GCKR               | rs1260326   | 0,0148                | 0,0419                 | 0,026                      | 9,75E-172     | 2,97E-110      | 8,93E-294          | 1,76                         | 0,62                          |
| LPL                | rs295       | -0,00932              | -0,0203                | -0,0267                    | 5,49E-54      | 1,61E-21       | 1E-241             | 2,86                         | 1,3                           |
| APOA4_APOC3        | rs10790164  | 0,0198                | 0,0632                 | 0,0555                     | 4,86E-43      | 1,32E-35       | 8,03E-185          | 2,8                          | 0,88                          |
| BUD13_LINC00900    | rs506222    | 0,0119                | 0,0368                 | 0,0308                     | 2,43E-43      | 2,36E-33       | 9,52E-157          | 2,59                         | 0,84                          |
| NCAN               | rs2228603   | -0,0243               | -0,099                 | -0,0344                    | 9,8E-135      | 1,68E-177      | 4,58E-151          | 1,42                         | 0,35                          |
| LPL                | rs268       | 0,0239                | 0,04                   | 0,0554                     | 1,2E-33       | 1,12E-08       | 2,3E-97            | 2,32                         | 1,4                           |
| LPL_SLC18A1        | rs11204087  | -0,00464              | -0,00995               | -0,0137                    | 5,17E-19      | 0,00000007     | 1,65E-86           | 2,95                         | 1,4                           |
| VPS37D_MLXIPL      | rs13230514  | -0,00489              | -0,00638               | -0,0146                    | 8,78E-18      | 0,00154        | 3,53E-82           | 2,99                         | 2,3                           |
| ANGPTL4            | rs116843064 | -0,011                | -0,0243                | -0,0466                    | 4,91E-09      | 0,000273       | 2,28E-76           | 4,24                         | 1,9                           |
| LPL_SLC18A1        | rs10103634  | -0,0031               | -0,00578               | -0,0133                    | 1,78E-08      | 0,00302        | 1,3E-73            | 4,29                         | 2,3                           |
| BUD13_LINC00900    | rs879858    | 0,0167                | 0,0557                 | 0,048                      | 4,92E-16      | 2,03E-14       | 5,85E-68           | 2,87                         | 0,86                          |
| VEGFA_LOC100132354 | rs4711750   | 0,00592               | 0,015                  | 0,0116                     | 2,08E-30      | 2,55E-16       | 1,23E-63           | 1,96                         | 0,77                          |
| TRIB1_LINC00861    | rs7832357   | 0,00672               | 0,0221                 | 0,0118                     | 7,61E-35      | 2,08E-30       | 6,13E-59           | 1,76                         | 0,53                          |
| BUD13_LINC00900    | rs180358    | -0,004                | -0,0117                | -0,0131                    | 2,22E-10      | 1,64E-07       | 1,3E-54            | 3,28                         | 1,1                           |
| ZNF512             | rs1881396   | -0,0075               | -0,0212                | -0,0128                    | 2,74E-33      | 7,81E-22       | 1,27E-53           | 1,71                         | 0,6                           |
| MAU2               | rs3764567   | -0,00663              | -0,0278                | -0,0103                    | 1,11E-34      | 3,82E-48       | 2,46E-46           | 1,55                         | 0,37                          |
| HLA-DQB1_HLA-DQA2  | rs17405319  | 0,00896               | 0,0305                 | 0,0126                     | 1,57E-40      | 1,56E-37       | 1,34E-44           | 1,41                         | 0,41                          |
| TRIB1              | rs74737417  | -0,00642              | -0,016                 | -0,02                      | 2,23E-09      | 0,0000242      | 3,95E-44           | 3,12                         | 1,2                           |
| LPL_SLC18A1        | rs1441778   | -0,00375              | -0,00724               | -0,0128                    | 1,05E-07      | 0,00372        | 2,92E-42           | 3,41                         | 1,8                           |

## Supplementary Table 2.

### Definition of CHD outcomes

| <b>CHD outcome</b>                   |                                                          | <b>Individuals, n=487,202</b> |
|--------------------------------------|----------------------------------------------------------|-------------------------------|
| Non-fatal myocardial infarction (MI) | ICD 9 codes 410, 4110, 412, 42979                        | Prevalent events n = 6,577    |
|                                      | ICD 10 codes I21, I22, I23, I241, I252                   | Incident events n = 17,356    |
| Fatal MI                             | ICD 10 codes I21, I23, I241, I251, I252, I253, I255-I259 | Incident events n = 3,850     |
| Coronary revascularisation           | <b>Operational procedures</b>                            | Prevalent events n = 2,845    |
|                                      | Codes K501, K40-K44                                      | Incident events n = 3,571     |
| Unique CHD outcomes                  | First event of above                                     | Prevalent events n = 8,391    |
|                                      |                                                          | Incident events n = 20,792    |
|                                      |                                                          | Total events = 29,183         |

Incident events based on approximately 12 years of follow (as of January 2021).

## Supplementary Table 3 A B – Replication analysis

### Replication of key findings in the CARDIoGRAMplusC4D data set.

Of the 1125 SNPs identified as associated with TRL/remnant-C (TRL/rem-C) and/or LDL-C in the UK Biobank (Supplementary Figure 1), 1049 were present also in the CARDIoGRAMplusC4D SNP set. The beta coefficients for lipid traits estimated using the UK Biobank were applied to SNP-outcome data in CARDIoGRAMplusC4D (myocardial infarction) using two-sample multivariable MR models.

A further analysis in the CARDIoGRAMplusC4D data set was done using univariable models examining the association of apoB with CHD within SNP clusters 1 and 2.

#### A. Two-sample multivariable models

|                                 | Nr of SNPS | CHD causal effect estimate (OR per unit change [95% CI]) | CHD causal effect estimate (OR per SD change [95% CI]) | P-value               |
|---------------------------------|------------|----------------------------------------------------------|--------------------------------------------------------|-----------------------|
| <b>Model with apoB + TRL-C</b>  | 1049       |                                                          |                                                        |                       |
| ApoB                            |            | 2.90 [2.14, 3.93]                                        | 1.28 [1.19, 1.37]                                      | 5.6x10 <sup>-12</sup> |
| TRL/remnant-C                   |            | 2.01 [1.48, 2.72]                                        | 1.25 [1.13, 1.38]                                      | 8.3x10 <sup>-06</sup> |
| <b>Model with LDL-C + TRL-C</b> | 1049       |                                                          |                                                        |                       |
| LDL-C                           |            | 1.42 [1.30, 1.56]                                        | 1.33 [1.24, 1.44]                                      | 9.6x10 <sup>-15</sup> |
| TRL/remnant-C                   |            | 1.84 [1.36, 2.49]                                        | 1.22 [1.11, 1.34]                                      | 6.8x10 <sup>-05</sup> |

#### B. Two-sample univariable models

|                       | Nr of SNPS | CHD causal effect estimate (OR per unit change [95% CI]) | CHD causal effect estimate (OR per SD change [95% CI]) | P-value               |
|-----------------------|------------|----------------------------------------------------------|--------------------------------------------------------|-----------------------|
| <b>Cluster 1 SNPs</b> | 509        |                                                          |                                                        |                       |
| ApoB                  |            | 4.78 [3.77, 6.07]                                        | 1.44 [1.36, 1.52]                                      | 7.6x10 <sup>-38</sup> |
| <b>Cluster 2 SNPs</b> | 388        |                                                          |                                                        |                       |
| ApoB                  |            | 9.38 [6.13, 14.34]                                       | 1.68 [1.52, 1.85]                                      | 5.5x10 <sup>-25</sup> |

### Conclusion

Key results from the UK Biobank analyses relating lipoprotein variables to CHD outcome were largely replicated in the CARDIoGRAMplus C4D data set. That is, TG, TRL/remnant-C and VLDL-C were independent predictors of CHD risk in models including apoB, and the gradient of association of apoB with CHD risk for cluster 2 was greater than for cluster 1.

## Sensitivity analyses

A number of sensitivity analyses were undertaken to determine the influence of:

- (1) *Choice of threshold for linkage disequilibrium* – further pruning was performed using  $r^2 < 0.01$  and  $r^2 < 0.001$ . Results are given in **Supplementary Table 4**.
- (2) *Pleiotropic effects* - Mendelian randomisation model results presented in the main text are derived using the inverse-variance weighted (IVW) method. Other methods are better equipped to handle possible bias stemming from pleiotropic effects and/or effects from inclusion of invalid instrumental variables. Results from these additional methods (ROBUST-IVW, LASSO and the MR-EGGER) are given in **Supplementary Table 5**.
- (3) *Weak instrumental bias* - Replication of results in a separate data set was used to check possible influence of weak instrumental bias (since exposure-outcome associations were tested in the same data set that was used to derive SNP exposure estimates). A replication analysis was undertaken by applying the beta coefficients for lipid traits in the UK Biobank SNP set to the CARDIoGRAMplusC4D outcome data. Results are reported above in **Supplementary Table 3**.

## Supplementary Table 4

Impact of choice of linkage disequilibrium (LD) significance threshold ( $r^2 < 0.1$ ,  $r^2 < 0.01$ ,  $r^2 < 0.001$ ) for pruning of GWAS SNP set.

**Table 4 Influence of LD threshold on multivariate models of TRL/remnant-C and LDL-C**

| Exposure      | Nr SNPs | CHD causal effect estimate (OR per unit change [95% CI]) <sup>b</sup> | CHD causal effect estimate (OR per SD change [95% CI]) <sup>c</sup> | P value               | P-diff               |
|---------------|---------|-----------------------------------------------------------------------|---------------------------------------------------------------------|-----------------------|----------------------|
| $r^2 < 0.1$   | 1125    |                                                                       |                                                                     |                       |                      |
| LDL-C         |         | 1.37 [1.27, 1.48]                                                     | 1.29 [1.22, 1.38]                                                   | $4.0 \times 10^{-16}$ |                      |
| TRL/remnant-C |         | 2.59 [1.99, 3.36]                                                     | 1.36 [1.25, 1.48]                                                   | $1.2 \times 10^{-12}$ | $1.4 \times 10^{-4}$ |
| $r^2 < 0.01$  | 663     |                                                                       |                                                                     |                       |                      |
| LDL-C         |         | 1.35 [1.19, 1.54]                                                     | 1.28 [1.15, 1.42]                                                   | $3.6 \times 10^{-06}$ |                      |
| TRL/remnant-C |         | 2.90 [1.91, 4.40]                                                     | 1.41 [1.23, 1.61]                                                   | $5.2 \times 10^{-07}$ | $4.6 \times 10^{-3}$ |
| $r^2 < 0.001$ | 469     |                                                                       |                                                                     |                       |                      |
| LDL-C         |         | 1.32 [1.14, 1.55]                                                     | 1.26 [1.11, 1.43]                                                   | $3.6 \times 10^{-04}$ |                      |
| TRL/remnant-C |         | 2.89 [1.74, 4.82]                                                     | 1.41 [1.20, 1.66]                                                   | $4.4 \times 10^{-05}$ | 0.017                |

1. Multivariate models including LDL-C and TRL/remnant-C as exposures were constructed using SNP sets derived as in Supplementary Figure 1 using significance thresholds of varying stringency to prune SNPs in linkage disequilibrium.
2. Odds ratios and confidence limits are given for each model as is the P value for association with CHD outcomes for each exposure and a P value for difference between the two odds ratios (determined using the function *linearHypothesis* in the R-package *car*)

## Conclusions

1. Relative risk estimates for CHD were in close agreement across all significance thresholds for  $r^2$ .
2. Use of more stringent  $r^2$  thresholds ( $< 0.01$ ,  $< 0.001$ ) reduced the number of SNPs and the statistical power to detect differences in the association of exposure with CHD risk.
3. The  $r^2$  threshold of  $< 0.1$  as adopted in the main analysis gave maximum power and generated estimated relative risk ratios in close agreement with more stringent thresholds.

## Supplementary Table 5

### BACKGROUND

The inverse-variance weighted method for Mendelian randomisation analysis assumes all SNP variants are ‘valid instrumental variables’, that is the effect on outcome (CHD event) is only through the effect on the designated exposure (risk factor). This may be a valid assumption when SNPs/genes are known to be involved in lipid metabolism. Use of larger, polygenic SNP sets identified by GWAS may include variants that do not meet this assumption i.e. are ‘invalid’. The requirement then is to assess statistically the number of possible invalid variants and their potential to bias the calculated odds ratios. Several statistical methodologies have been devised to test the possibility that SNP horizontal pleiotropy may have biased the association of the exposure with outcome.

**Supplementary Table 5** presents an assessment of potential pleiotropic effects. We used the multivariable model of TRL/remnant-C plus LDL-C as a test of pleiotropy in the GWAS-derived SNP set. The model was replicated using in addition to standard MR-IVW, the outlier-tolerant ROBUST weighted-IVW,<sup>1</sup> the Lasso,<sup>2</sup> and the Egger statistical methods which evaluate, and are tolerant of, outliers and pleiotropic effects respectively.

### Multivariable Mendelian randomisation (MR) analysis comparing inverse-variance weighted (IVW) method, ROBUST weighted-IVW method, Lasso method and Egger method.

|                      | Method     | Nr of SNPS  | Valid SNPs | CHD causal effect estimate (OR per unit change [95% CI]) | CHD causal effect estimate (OR per SD change [95% CI]) | P-value               |
|----------------------|------------|-------------|------------|----------------------------------------------------------|--------------------------------------------------------|-----------------------|
| <b>Multivariable</b> |            | <b>1125</b> |            |                                                          |                                                        |                       |
| LDL-C                | IVW        |             | 1125       | 1.37 [1.27, 1.48]                                        | 1.29 [1.22, 1.38]                                      | 4.0×10 <sup>-16</sup> |
| TRL/remnant-C        | IVW        |             | 1125       | 2.59 [1.99, 3.36]                                        | 1.36 [1.25, 1.48]                                      | 1.2×10 <sup>-12</sup> |
| <b>Multivariable</b> |            | <b>1125</b> |            |                                                          |                                                        |                       |
| LDL-C                | ROBUST-IVW |             | 1125       | 1.42 [1.30, 1.54]                                        | 1.33 [1.24, 1.43]                                      | 3.4×10 <sup>-16</sup> |
| TRL/remnant-C        | ROBUST-IVW |             | 1125       | 2.31 [1.73, 3.07]                                        | 1.31 [1.19, 1.44]                                      | 1.1×10 <sup>-8</sup>  |
| <b>Multivariable</b> |            | <b>1125</b> |            |                                                          |                                                        |                       |
| LDL-C                | Lasso      |             | 972        | 1.43 [1.35, 1.52]                                        | 1.34 [1.28, 1.41]                                      | 3.3×10 <sup>-32</sup> |
| TRL/remnant-C        | Lasso      |             | 972        | 2.18 [1.77, 2.69]                                        | 1.29 [1.20, 1.38]                                      | 1.6×10 <sup>-13</sup> |
| <b>Multivariable</b> |            | <b>1125</b> |            |                                                          |                                                        |                       |
| LDL-C                | Egger      |             | 1125       | 1.35 [1.25, 1.46]                                        | 1.28 [1.20, 1.37]                                      | 3.1×10 <sup>-13</sup> |
| TRL/remnant-C        | Egger      |             | 1125       | 2.45 [1.84, 3.25]                                        | 1.34 [1.22, 1.46]                                      | 7.1×10 <sup>-10</sup> |

### CONCLUSION

The close agreement of causal estimates across the four statistical approaches provides a high degree of confidence in the application of the inverse-variance weighted method in multivariable Mendelian randomisation models used in the present analysis.

**Supplementary Figure 1.** Flowchart of subject- and SNP selection as basis for the Mendelian Randomisation analyses.

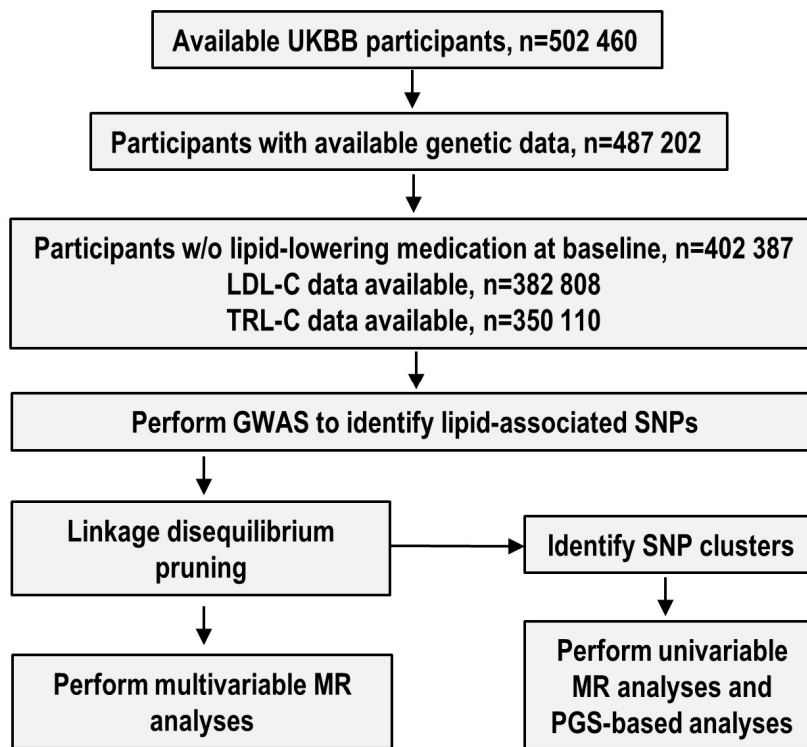

1. Genetic instruments (SNPs) and beta coefficients were determined in subjects not on lipid-lowering therapy in whom appropriate lipoprotein levels were available (in the case of TRL/remnant-C the number of subjects was 350,110). This selection criterion eliminated the confounding effects of drugs (mainly statins) on the SNP to exposure relationship.
2. The association of genetically-determined variation in lipoprotein variables with CHD outcome was explored using all subjects with appropriate genetic information available. The number of subjects in these analyses was 487,202 and included those off or on lipid-lowering treatment.
3. Analysis of the relationship between observed lipoprotein variables measured at baseline and incident CHD was undertaken in subjects free of CHD at baseline. The number of subjects meeting this criterion was 478,811.



## Supplementary Figure 2

Association of indirectly measured TRL/remnant-C with TG and LDL-C in subjects not on lipid-lowering treatment.

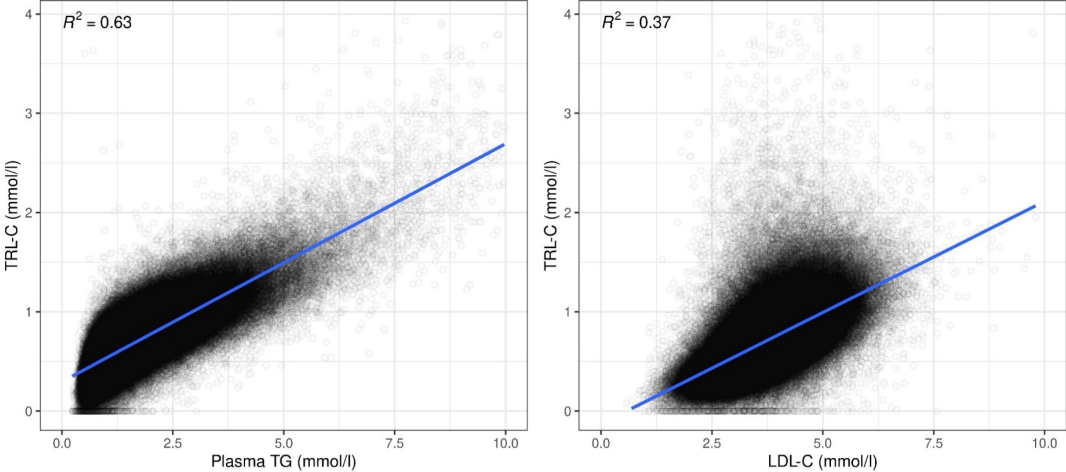

### Supplementary Figure 3

Effect sizes of GWAS derived SNPs on apoB in relation to TG and LDL-C.

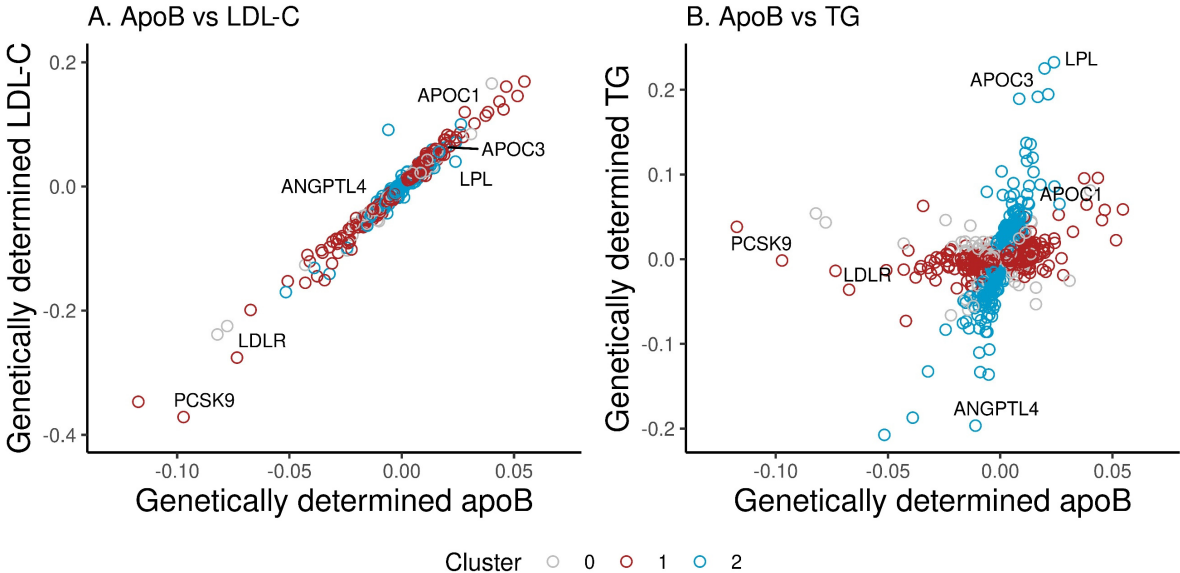

## REFERENCES

1. Burgess S, Bowden J, Dudbridge F, Thompson SG. Robust instrumental variable methods using multiple candidate instruments with application to Mendelian randomization. arXiv preprint arXiv:1606.03729 2016.
2. Rees JMB, Wood AM, Dudbridge F, Burgess S. Robust methods in Mendelian randomization via penalization of heterogeneous causal estimates. PLoS One 2019;**14**(9):e0222362.
